# Supplementary material for: The phosphatase Pgam5 antagonizes Wnt/β-Catenin signaling in embryonic anterior-posterior axis patterning
Source: Oxford University Press journal article supplement (doi:10.1242/dev.144477), 2017-01-01
Supplement: dev144477supp.pdf [file dev144477supp.pdf]

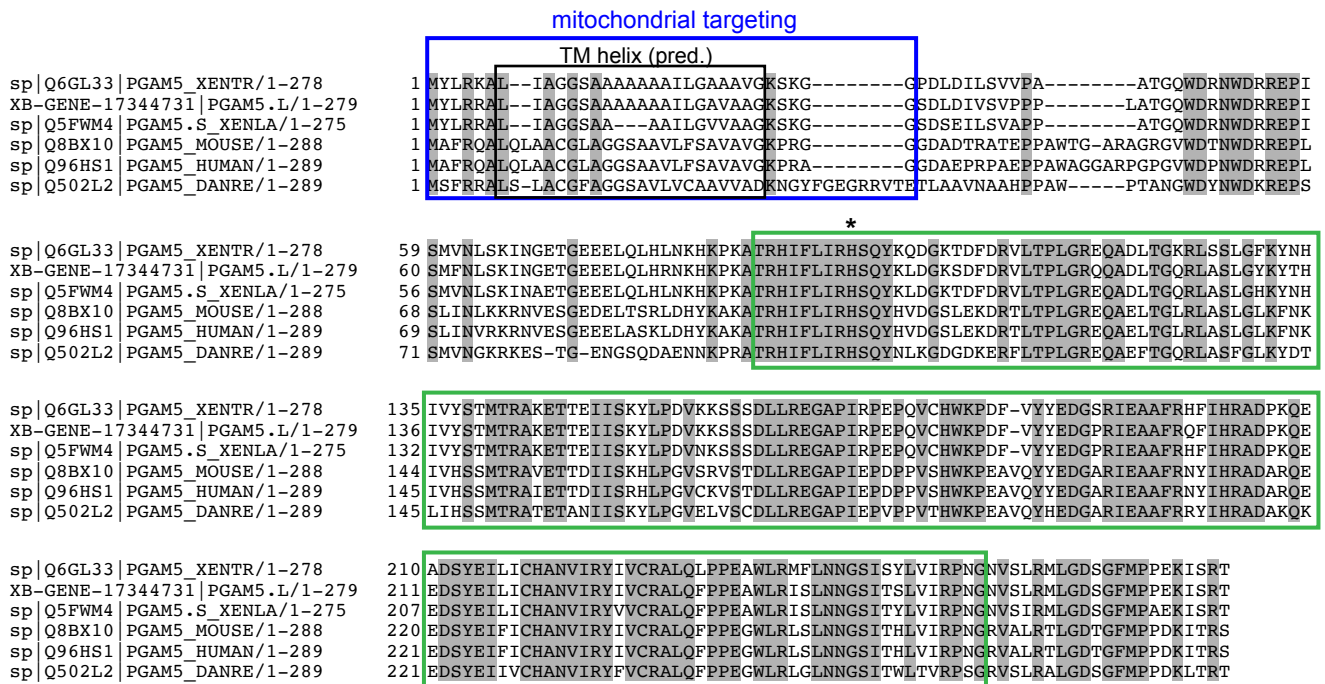

### Supplementary Figure 1

Alignment of *Xenopus tropicalis* Pgam5, *Xenopus laevis* Pgam5.S and Pgam5.L to the zebrafish, human and mouse orthologs (Uniprot Accession Numbers *X. tropicalis* Pgam5 Q6GL33, *X. laevis* Pgam5.S Q5FWM4, *X. laevis* Pgam5 was translated from XB-GENE-17344731, *D. rerio* Pgam5 Q502L2, *H. sapiens* PGAM5 Q96HS1, *M. musculus* Pgam5 Q8BX10). Identical amino acids are shaded grey. The boxes mark functional features: blue – mitochondrial targeting sequence (Lo and Hannink, 2008), black: predicted transmembrane helix, green – PGAM domain. Histidine 105 (human numbering) in the catalytic center is labeled with an asterisk.

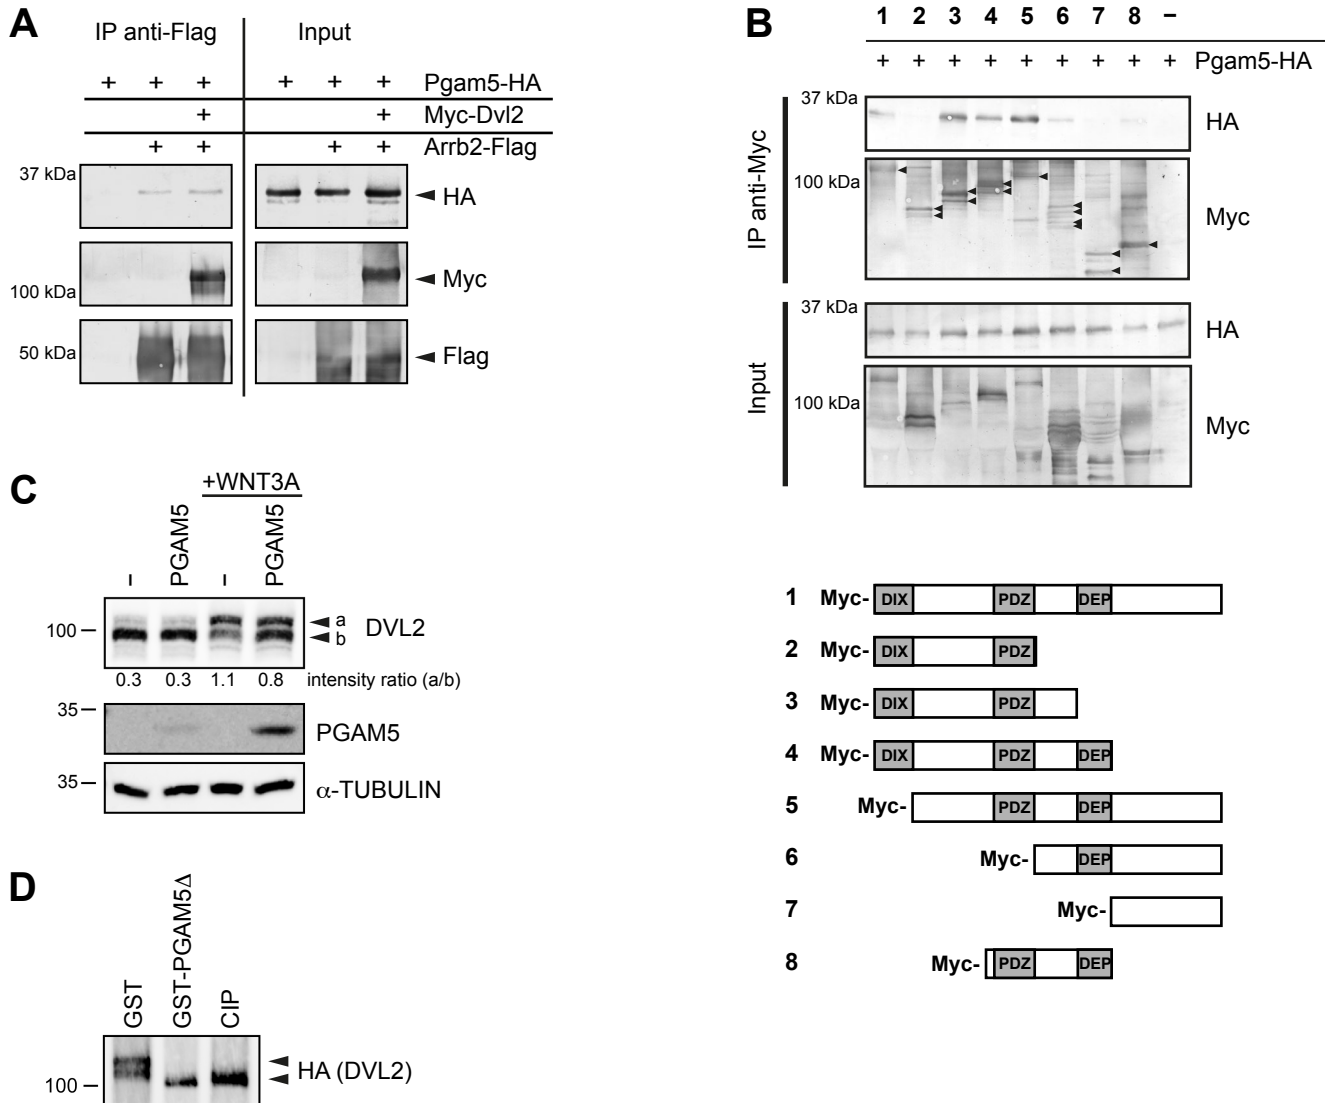

### Supplementary Figure 2

(A) Co-immunoprecipitation of overexpressed proteins shows a weak interaction of Pgam5 with Arrb2, which is slightly increased by co-expression of Dvl2. (B) Western blot corresponding to Fig. 1D. The binding site of Pgam5 to Dvl2 was mapped to the region interspersing the PDZ and DEP domain of Dvl2 by co-immunoprecipitation of Pgam5-HA with a series of truncated Dvl2-Myc constructs (1-8) as illustrated.

(C) Overexpression of PGAM5 partially reverted WNT3A induced electrophoretic mobility shifts of endogenous DVL2 in HEK 293T cells, indicating that PGAM5 dephosphorylates DVL2. (D) HA-DVL2 was immunoprecipitated, washed with high stringency to remove bound proteins and incubated with recombinant GST, GST-PGAM5Δ (lacking the N-terminal mitochondrial targeting sequence) or Calf Intestinal Alkaline Phosphatase (CIP) for 30 min at 37°C. The sample incubated with GST showed two bands. After incubation with GST-PGAM5Δ or CIP only one band with higher electrophoretic mobility remained, which confirmed that DVL2 is directly dephosphorylated by PGAM5.

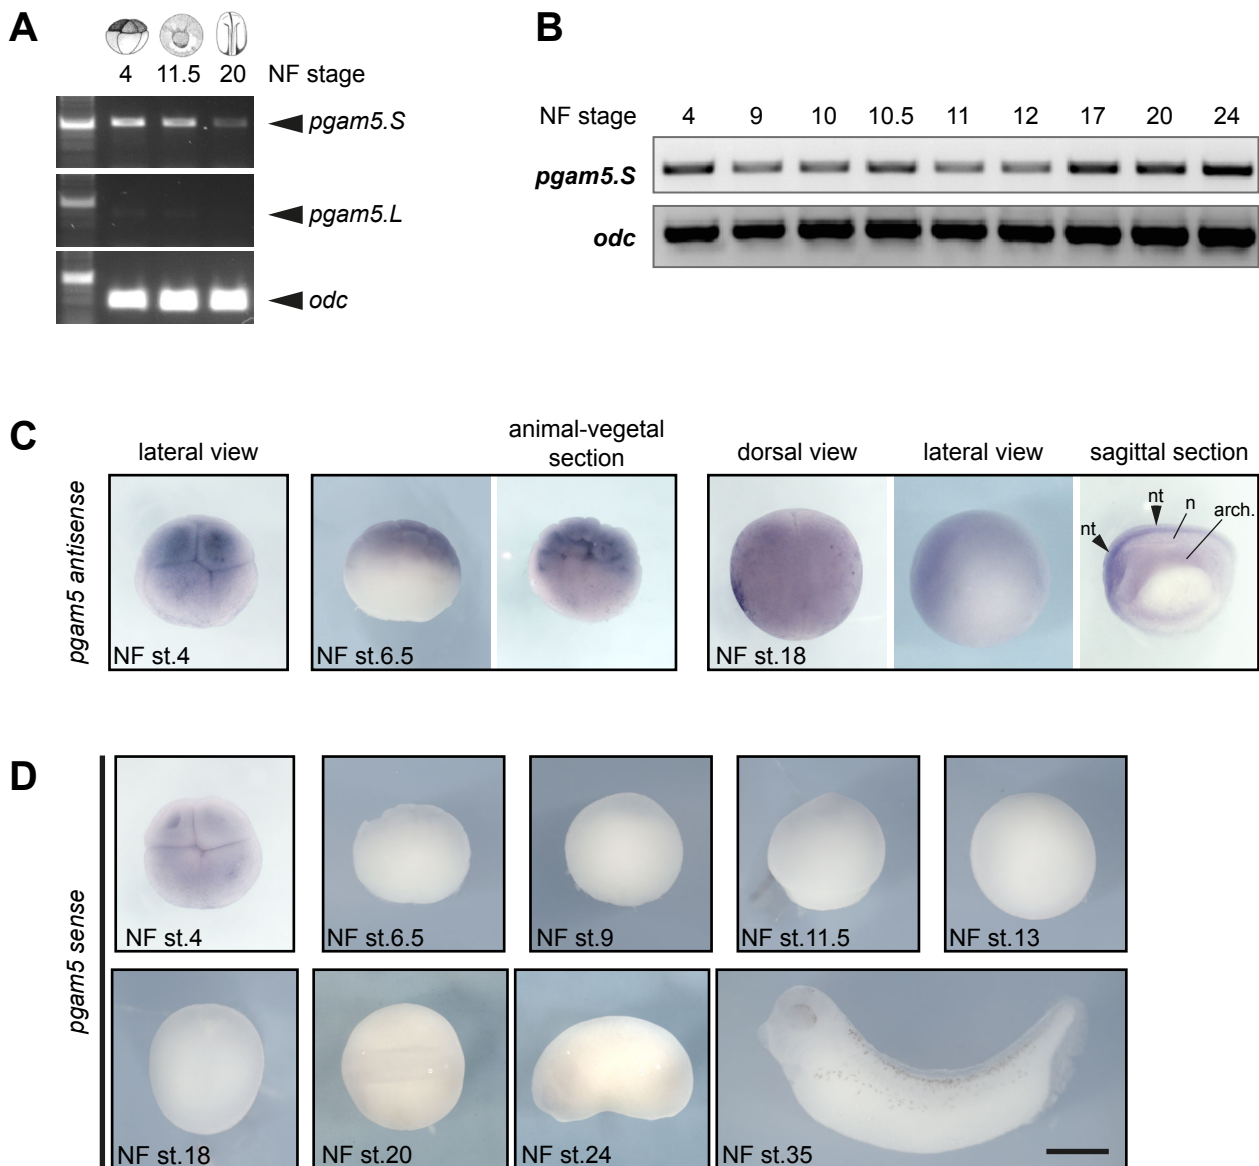

### Supplementary Figure 3

(A) Transcripts of *pgam5.S* and *pgam5.L* homeologs were amplified by RT-PCR from whole embryos of the indica-ted stages; *ornithine decarboxylase* (*odc*) was used as house-keeping gene. The arrows indicate the expected fragment size. In contrast to *pgam5.S*, transcripts of *pgam5.L* were barely detectable and only in stage 4 embryos. (B) *pgam5.S* transcripts were present maternally (NF stage 4) and throughout early embryonic development (NF stages 9-24).

(C) Supplementary in situ hybridization data. Maternal *pgam5.S* transcripts were detected predominantly in the animal blastomeres at NF stage 4 (8-cell stage) and at early blastula stage 6.5. At stage 18/19 *pgam5* was broadly expressed in the dorsal ectoderm and the neural tube (nt). A sagittal section showed that expression was strongest in the anterior neural tube and gradually decreased towards posterior (arrowheads indicate neural tube (nt), n – notochord, arch. – archenteron). The archenteron cavity appears stained due to trapped dye.

(D) Sense controls corresponding to images in (A) and in Figure 3A.

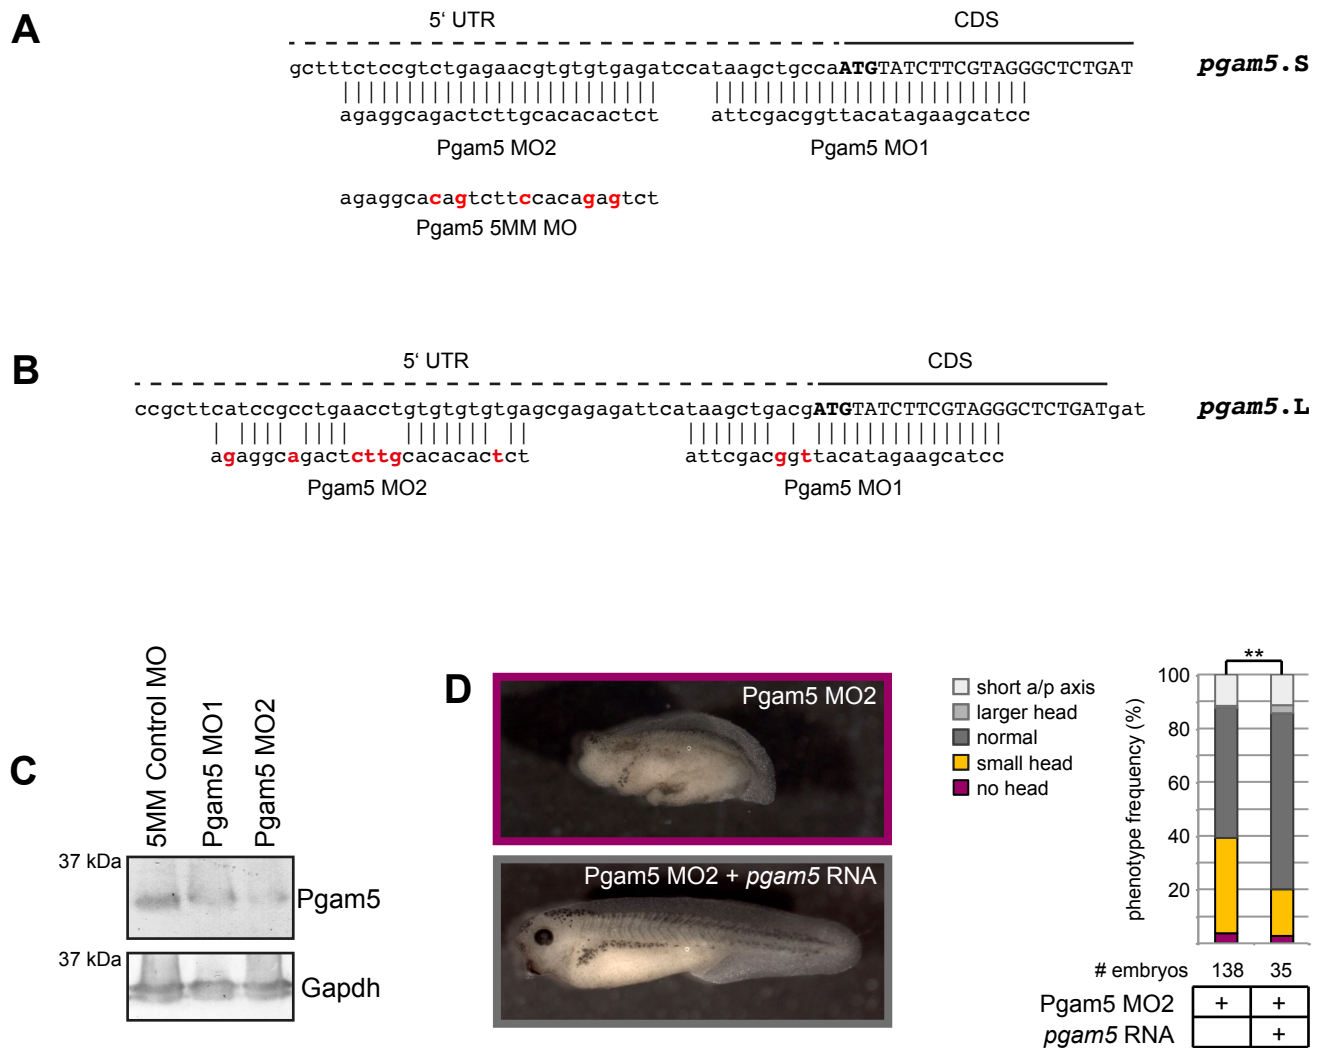

### Supplementary Figure 4

(A) Translation-blocking antisense morpholino oligonucleotides were used to knock-down Pgam5 in *Xenopus laevis* embryos. Pgam5 MO1 and Pgam5 MO2 target two non-overlapping sites in *pgam5.S* transcripts at and close to the translation start respectively. The alignment shows the binding sites of MO1 and MO2 to the *pgam5.S* mRNA and base exchanges in the Pgam5 5-mismatch Control MO. (B) Alignment of Pgam5 MO1 and Pgam5 MO2 to *pgam5.L*. Pgam5 MO1 aligns with only two mismatches also to *pgam5.L* and therefore MO1 can be expected to suppress also translation from *pgam5.L*. The sequence in *pgam5.L* corresponding to the Pgam5 MO2 binding site contains seven nucleotide exchanges, therefore Pgam5 MO2 is not expected to affect *pgam5.L* translation. (C) Injection of either Pgam5 MO1 or Pgam5 MO2 into both blastomeres at the two-cell stage resulted in knock-down of Pgam5 at stage 11.5.

(D) Representative phenotypes of embryos injected with 0.4 pmol Pgam5 MO2 or co-injected with MO-insensitive *pgam5* RNA as indicated. Co-injection of *pgam5* RNA rescues the phenotype of Pgam5 morphant embryos. Frequencies of phenotypes from at least three independent experiments are summarized in the graph; the total numbers of embryos are provided below each column. The  $\chi^2$ -test was used for statistical analysis (\*\* p-value < 0.01).

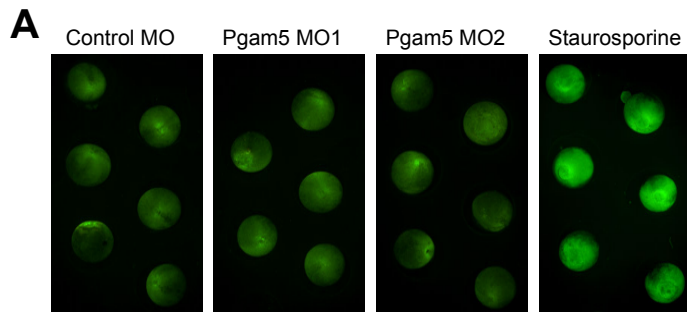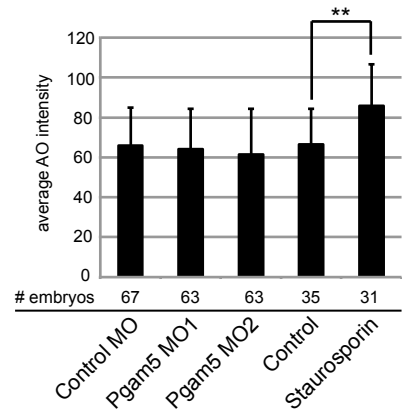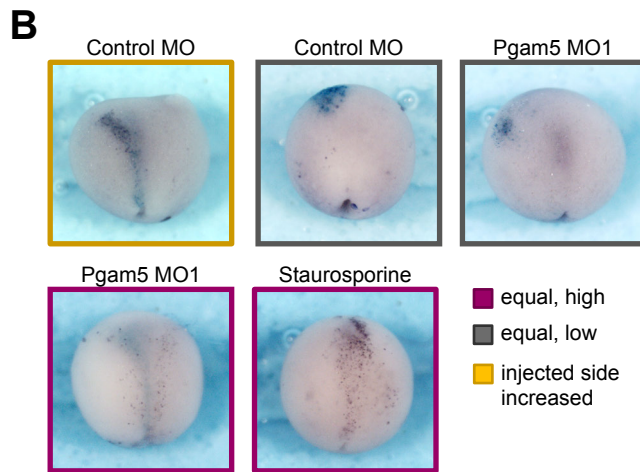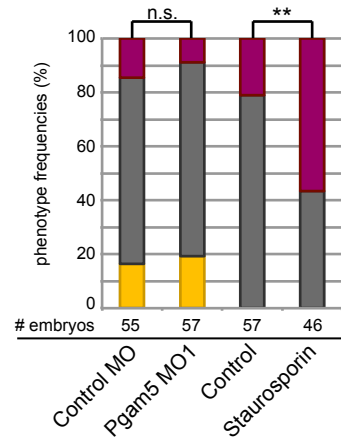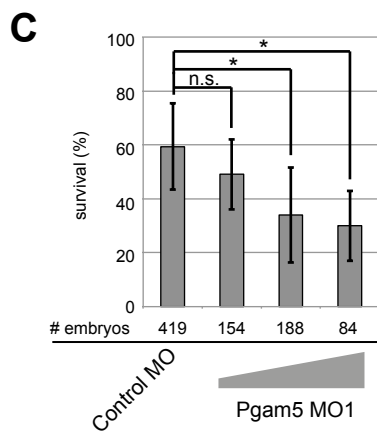

## Supplementary Figure 5

Knock-down of Pgam5 did not cause increased cell death.

(A) Embryos were injected with 0.4 pmol Control MO, Pgam5 MO1 or Pgam5 MO2 into both blastomeres at the two-cell stage. At NF stage 12.5 embryos were stained for dead cells with 1 µg/ml Acridine Orange in 0.1x MBSH for 30 min, washed three times with 0.1x MBSH and imaged using a Leica M165FC stereomicroscope equipped with epifluorescence optics and a Jenoptik ProgRes C14 camera. As positive control, embryos were treated at NF stage 11.5 for 2h with 1µM staurosporine or buffer only, stained with Acridine Orange and imaged as described above. Image acquisition parameters were kept constant for all images. Mean fluorescence intensities were measured for each embryo using the Image J software package. The images show representative embryos injected with Control MO, Pgam5 MO1 or Pgam5 MO2 as well as staurosporine-treated embryos. The average fluorescence intensities  $\pm$  SD are plotted in the graph; values did not differ significantly between Control MO, MO1 and MO2 (separate variances t-test, p-values > 0.7), staurosporine treatment significantly increased Acridine Orange fluorescence intensity compared to control embryos (\*\* p-value < 0.01). The total numbers of analyzed embryos from four independent experiments are given below each column.

(B) Embryos were injected with 0.4 pmol Control MO or Pgam5 MO1 and co-injected with 100 pg pCS2 *LacZ* into one blastomere at the four-cell stage. As positive control, embryos were treated with 1µM staurosporine for 1h at NF stage 19. At NF stage 20 embryos were fixed and stained for  $\beta$ -Galactodidase. Cleaved Caspase 3 (Cleaved Casp3) was detected by whole-mount immunostaining and colorimetric Alkaline Phosphatase staining (NBT/BCIP). For MO-injected embryos Cleaved Casp3-positive cells on injected and uninjected sides were compared and categorized into equal (low/high) or increased numbers in the injected side. Staurosporine-treated embryos were compared with control embryos and categorized into low or high number of Cleaved Casp3-positive cells. The graph summarizes the results from four independent experiments (\*\* p-value < 0.01  $\chi^2$ -test). The total numbers of embryos are provided below each column.

(C) Embryos were injected with 1.6 pmol Control MO or 0.4 pmol, 0.8 pmol or 1.6 pmol Pgam5 MO1 and cultured till NF stage 40. The graph shows the average survival rates from at least three independent experiments. The total numbers of embryos are provided below each column. Injection of 0.4 pmol MO1 did not significantly affect survival, whereas survival rates dropped significantly after injection of higher doses of MO1 (separate variances t-test, \* p-value < 0.05).

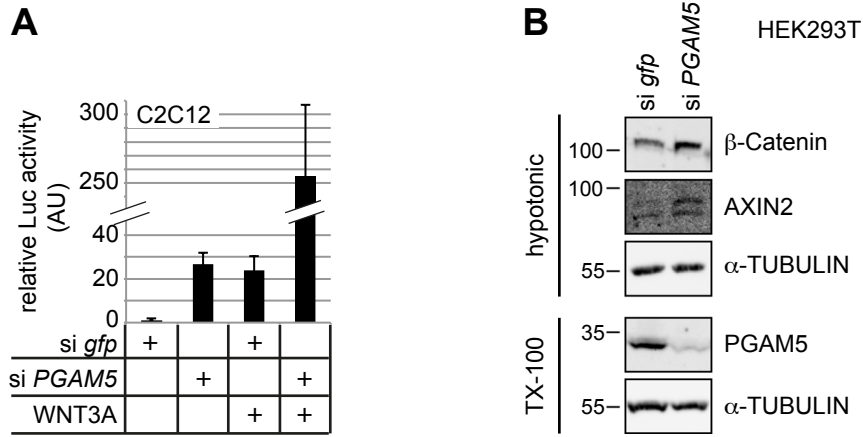

### Supplementary Figure 6

(A) Knock-down of PGAM5 by siRNA transfection strongly enhanced responsiveness of murine C2C12 cells to WNT3A stimulation as determined by TOP-Flash reporter gene assays normalized to  $\beta$ -Galactosidase. (B) PGAM5 knock-down in HEK293T cells resulted in stabilization of cytoplasmic  $\beta$ -Catenin and upregulation of the feedback target AXIN2.

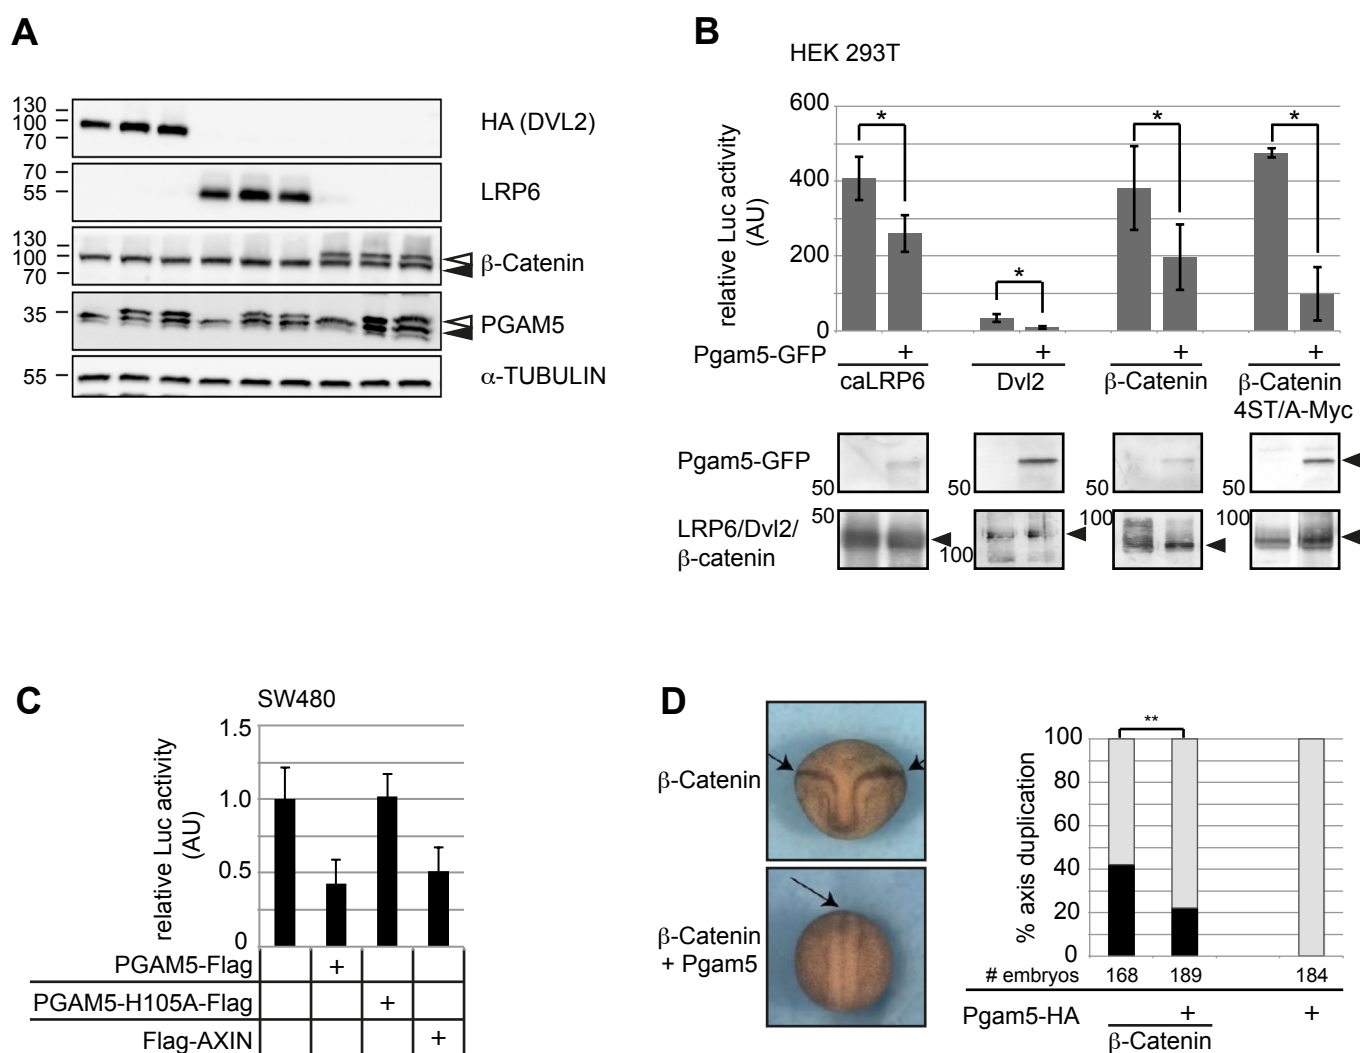

### Supplementary Figure 7

(A) Expression of overexpressed proteins corresponding to Figure 7A was confirmed by Western Blot. Filled arrowheads indicate endogenous proteins, open arrowheads indicate overexpressed proteins. (B) *Xenopus* Pgam5 antagonized TOP-Flash activation by constitutively-active LRP6, Dvl2, β-Catenin or stabilized β-Catenin 4ST/A-Myc. The graph shows average  $\pm$  SD from at least three independent experiments. Statistical significance of deviations was calculated using the t-test for the hypothesis of the mean (\* p-value < 0.05). Expression of overexpressed proteins was confirmed by Western Blot; corresponding blots are provided below the respective columns. (C) Overexpression of PGAM5 in SW480 colon carcinoma cells suppressed constitutive Wnt/β-Catenin activity; the phosphatase-inactive mutant PGAM5-H105A had no effect. Overexpression of AXIN downregulated TOP-Flash activity comparable to PGAM5. TOP-Flash values were normalized to β-Galactosidase. (D) Secondary body axes were induced in *Xenopus laevis* embryos by injection of 400 pg β-catenin RNA and 100 pg pgam5 RNA was co-injected as indicated into both ventral blastomeres at the four-cell stage. The graph shows the frequency of axis duplication from four independent experiments; statistical significance of deviations was calculated using the  $\chi^2$ -test; \*\* p-value < 0.01. Images show representative examples of embryos; arrows indicate neural tubes in the primary and – if present – in the secondary axis.



**Supplementary Table 1**

Plasmids and antisense Oligonucleotides

| Plasmid / Morpholino / siRNA     |                                 | Reference                       |
|----------------------------------|---------------------------------|---------------------------------|
| Pgam5 MO1                        | 5'-cctacgaagatacattggcagctta-3' | this study                      |
| Pgam5 MO2                        | 5'-tctcacacacgttctcagacggaga-3' | this study                      |
| Pgam5 5MM MO                     | 5'-tctgagacaccttctgacacggaga-3' | this study                      |
| si <i>PGAM5</i>                  | 5'-cgcccgugucucauuggaa -3'      | this study                      |
| si <i>gfp</i>                    | 5'-gcuaccuguuccauggcca -3'      | this study                      |
| pCRII Pgam5                      |                                 | this study                      |
| pCS2+ Pgam5-HA                   |                                 | this study                      |
| pCS2+ Pgam5-GFP                  |                                 | this study                      |
| pCS2+ PGAM5-Flag                 |                                 | this study                      |
| pCS2+ PGAM5-H105A-Flag           |                                 | this study                      |
| pcDNA3.1 PGAM5-Flag              |                                 | Takeda et al., 2009             |
| pcDNA3.1 PGAM5-H105A-Flag        |                                 | Takeda et al., 2009             |
| pGEX4T3 PGAM5 $\Delta$           |                                 | this study                      |
| pN1 PGAM5                        |                                 | this study                      |
| pCS2+ DKK1-GFP                   |                                 | Kagermeier-Schenk et al., 2011  |
| pcDNA3.1 Arrb2-Flag              |                                 | Seitz et al., 2014              |
| pCS2+ myc-Dvl2                   |                                 | Seitz et al., 2014              |
| pcDNA3.1 HA-DVL2                 |                                 | this study                      |
| pcDNA3.1 Flag-AXIN               |                                 | Kishida et al., 1999            |
| pCS2+ LRP6 $\Delta$ E1-E4        |                                 | Mao et al., 2001                |
| pCS2+ $\beta$ -Catenin-myc       |                                 | Yost et al., 1996               |
| pCS2+ $\beta$ -Catenin 4ST/A-myc |                                 | Yost et al., 1996               |
| pcDNA3.1 beta-Catenin S33Y       |                                 | this study                      |
| pCS2+ Tcf1-Flag                  |                                 | Ralph Rupp, Munich              |
| pCS2+ LacZ                       |                                 | Schille et al., 2016            |
| pGL3 Super 8x TOPFlash           |                                 | Korinek et al., 1997            |
| pGL TK Renilla                   |                                 | Promega GmbH, Mannheim, Germany |

**Supplementary Table 2**

## Antibodies and reagents

| <b>Antibody / Reagent</b>              | <b>Dilution</b> | <b>Source / Reference</b>                                    |
|----------------------------------------|-----------------|--------------------------------------------------------------|
| Rabbit anti-PGAM5                      | 1:1000          | Abcam plc, Cambridge, UK;<br># ab126534                      |
| Mouse anti-PGAM5                       | 1:1000          | Atlas Antibodies AB, Stockholm, Sweden<br>#AMAb90803         |
| Rabbit anti-DVL2                       | 1:1000          | Proteintech Europe Inc, Manchester, UK<br>#12037-1-AP        |
| Mouse anti-Dvl2                        | 1:500           | bio-technie, Minneapolis, USA;<br>#MAB4216                   |
| Rabbit anti-ARRB2                      | 1:1000          | Proteintech Europe, Manchester, UK<br>#10171-1-AP            |
| Mouse anti-Arrb2                       | 1:1000          | Abcam plc, Cambridge, UK;<br>#ab54790                        |
| Rabbit anti- $\beta$ -Catenin          | 1:1000          | Santa Cruz Biotechnology Inc., Dallas, TX, USA<br>#sc-7199   |
| Rat anti- $\beta$ -Catenin             | 1:1000          | Ralph Rupp, Ludwig-Maximilians-University Munich,<br>Germany |
| Rabbit anti-GFP                        | 1:1000          | Cell Signaling Technology Inc., Danvers, MA, USA<br>#2956    |
| Rabbit anti-GFP                        | 1:2000          | Acris Antibodies GmbH, Herford, Germany;<br>#SP3005P         |
| Mouse anti-GAPDH                       | 1:2000          | Proteintech Europe Inc, Manchester, UK;<br>#60004-1-Ig       |
| Rabbit anti-TIMM44                     | 1:500           | Proteintech Europe Inc, Manchester, UK<br>#13859-1-AP        |
| Mouse anti-Lamin B2                    | 1:500           | Santa Cruz Biotechnology Inc., Dallas, TX, USA<br>#sc-56147  |
| Rabbit anti-panCadherin                | 1:1000          | Cell Signaling Technology Inc., Danvers, MA, USA<br>#4068    |
| Mouse anti-dephospho- $\beta$ -Catenin | 1:500           | Merck Millipore, Darmstadt, Germany;<br>#05-665              |
| Mouse anti-Axin2 (C/G7)                | 1:50            | Lustig et al., 2002                                          |
| Rat anti- $\alpha$ -Tubulin            | 1:1000          | AbD Serotec;<br>#MCA77G                                      |
| Mouse anti- $\beta$ -Actin             | 1:1000          | Sigma-Aldrich Chemie GmbH, Munich, Germany;<br>A5441         |

|                                  |                    |                                                            |
|----------------------------------|--------------------|------------------------------------------------------------|
| Rabbit anti-HA                   | 1:1000             | Sigma-Aldrich Chemie GmbH, Munich, Germany;<br>H6908       |
| Mouse anti-GST                   | 1:1000             | Sigma-Aldrich Chemie GmbH, Munich, Germany;<br>G1160       |
| Mouse anti-Flag<br>immobilized   | assay<br>dependent | Sigma-Aldrich Chemie GmbH, Munich, Germany;<br>#A2220      |
| Dynabeads Protein G              | assay<br>dependent | ThermoFisher Germany, Darmstadt, Germany;<br>#10004D       |
| Staurosporine                    | 1 $\mu$ M          | Cell Signaling Technology Inc., Danvers, MA, USA<br>#9953  |
| Acridine Orange                  | 1 $\mu$ g/ml       | Appllichem GmbH, Darmstadt, Germany;<br>#A1398             |
| Rabbit anti-Cleaved<br>Caspase 3 | 1:500              | Cell Signaling Technology Inc., Danvers, MA, USA;<br>#9661 |

**Supplementary Table 3**

Primers for qRT-PCR and RT-PCR

| Primer Name    | Sequence                | Reference                   |
|----------------|-------------------------|-----------------------------|
| <b>qRT-PCR</b> |                         |                             |
| odc fwd        | cattgcagagcctgggagata   | Schambony and Wedlich, 2007 |
| odc rev        | tccacttgctcattcaccataac | Schambony and Wedlich, 2007 |
| xnr3 fwd       | cgagtgaagaaggtggaca     | Bryja et al., 2007          |
| xnr3 rev       | atctcatggggacacagga     | Bryja et al., 2007          |
| msgn1 fwd      | ctggacaaggtctggaggagat  | this study                  |
| msgn1 rev      | tttatgcccatgatccttctg   | this study                  |
| hoxd1 fwd      | ggacaaatttcaccaccaaaca  | this study                  |
| hoxd1 rev      | ggatcgttgagctgcagagag   | this study                  |
| dkk1 fwd       | gatgcctaccgctctacagtt   | this study                  |
| dkk1 rev       | ggacacaaattccgttgctaca  | this study                  |
| <b>RT-PCR</b>  |                         |                             |
| odc_fwd        | gatgggctggatcgtatcgt    | Schille et al., 2016        |
| odc_rev        | tggcagcagtacagacagca    | Schille et al., 2016        |
| pgam5.S_fwd1   | atccaagcaggaagaagacag   | this study                  |
| pgam5.S_rev1   | agccaagaaataaggcacaga   | this study                  |
| pgam5.S_fwd2   | atctcagtcagcggaaactc    | this study                  |
| pgam5.S_rev2   | tgctctcgtcattgtggagtaaa | this study                  |
| pgam5.L_fwd1   | gacgtcagtggtggaaactc    | this study                  |
| pgam5.L_rev1   | actgtgagtgtcggatcaggaa  | this study                  |

## Supplementary References

- Bryja, V., Gradl, D., Schambony, A., Arenas, E. and Schulte, G.** (2007). Beta-arrestin is a necessary component of Wnt/beta-catenin signaling in vitro and in vivo. *Proc Natl Acad Sci USA* **104**, 6690–6695.
- Kagermeier-Schenk, B., Wehner, D., Ozhan-Kizil, G., Yamamoto, H., Li, J., Kirchner, K., Hoffmann, C., Stern, P., Kikuchi, A., Schambony, A., et al.** (2011). Waif1/5T4 inhibits Wnt/ $\beta$ -catenin signaling and activates noncanonical Wnt pathways by modifying LRP6 subcellular localization. *Dev Cell* **21**, 1129–1143.
- Kishida, S., Yamamoto, H., Hino, S., Ikeda, S., Kishida, M. and Kikuchi, A.** (1999). DIX domains of Dvl and axin are necessary for protein interactions and their ability to regulate beta-catenin stability. *Mol Cell Biol* **19**, 4414–4422.
- Korinek, V., Barker, N., Morin, P. J., van Wichen, D., de Weger, R., Kinzler, K. W., Vogelstein, B. and Clevers, H.** (1997). Constitutive transcriptional activation by a beta-catenin-Tcf complex in APC-/- colon carcinoma. *Science* **275**, 1784–1787.
- Lustig, B., Jerchow, B., Sachs, M., Weiler, S., Pietsch, T., Karsten, U., van de Wetering, M., Clevers, H., Schlag, P. M., Birchmeier, W., et al.** (2002). Negative feedback loop of Wnt signaling through upregulation of conductin/axin2 in colorectal and liver tumors. *Mol Cell Biol* **22**, 1184–1193.
- Mao, J., Wang, J., Liu, B., Pan, W., Farr, G. H., Flynn, C., Yuan, H., Takada, S., Kimelman, D., Li, L., et al.** (2001). Low-density lipoprotein receptor-related protein-5 binds to Axin and regulates the canonical Wnt signaling pathway. *Mol Cell* **7**, 801–809.
- Schambony, A. and Wedlich, D.** (2007). Wnt-5A/Ror2 regulate expression of XPAPC through an alternative noncanonical signaling pathway. *Dev Cell* **12**, 779–792.
- Schille, C., Bayerlová, M., Bleckmann, A. and Schambony, A.** (2016). Ror2 signaling is required for local upregulation of GFD6 and activation of BMP signaling at the neural plate border. *Development* **143**, 3182–3194.
- Seitz, K., Dürsch, V., Harnoš, J., Bryja, V., Gentzel, M. and Schambony, A.** (2014).  $\beta$ -Arrestin interacts with the beta/gamma subunits of trimeric G-proteins and dishevelled in the Wnt/Ca(2+) pathway in xenopus gastrulation. *PLoS ONE* **9**, e87132.
- Takeda, K., Komuro, Y., Hayakawa, T., Oguchi, H., Ishida, Y., Murakami, S., Noguchi, T., Kinoshita, H., Sekine, Y., Iemura, S.-I., et al.** (2009). Mitochondrial phosphoglycerate mutase 5 uses alternate catalytic activity as a protein serine/threonine phosphatase to activate ASK1. *Proc Natl Acad Sci USA* **106**, 12301–12305.
- Yost, C., Torres, M., Miller, J. R., Huang, E., Kimelman, D. and Moon, R. T.** (1996). The axis-inducing activity, stability, and subcellular distribution of beta-catenin is regulated in Xenopus embryos by glycogen synthase kinase 3. *Genes Dev* **10**, 1443–1454.
